# Supplementary material for: Phenotypic Array for Identification and Screening of Antifungals against Aspergillus Isolates from Respiratory Infections in KwaZulu Natal, South Africa
Source: MDPI journal article supplement (doi:10.3390/jof9060616), 2023-05-26
Supplement: s1 [file s1]

|                        |                    |                          |                        |                        |                             |                        |                      |                  |                 |                 |                            |
|------------------------|--------------------|--------------------------|------------------------|------------------------|-----------------------------|------------------------|----------------------|------------------|-----------------|-----------------|----------------------------|
| A1                     | A2                 | A3                       | A4                     | A5                     | A6                          | A7                     | A8                   | A9               | A10             | A11             | A12                        |
| Water                  | Tween 80           | N-Acetyl-D-Galactosamine | N-Acetyl-D-Glucosamine | N-Acetyl-D-Mannosamine | Adonitol                    | Amygdalin              | D-Arabinose          | L-Arabinose      | D-Arabitol      | Arbutin         | D-Cellobiose               |
| B1                     | B2                 | B3                       | B4                     | B5                     | B6                          | B7                     | B8                   | B9               | B10             | B11             | B12                        |
| ®-Cyclodextrin         | ®-Cyclodextrin     | Dextrin                  | i-Erythritol           | D-Fructose             | L-Fucose                    | D-Galactose            | D-Galacturonic Acid  | Gentiobiose      | D-Gluconic Acid | D-Glucosamine   | ®-D-Glucose                |
| C1                     | C2                 | C3                       | C4                     | C5                     | C6                          | C7                     | C8                   | C9               | C10             | C11             | C12                        |
| Glucose-1-Phosphate    | Glucuronamide      | D-Glucuronic Acid        | Glycerol               | Glycogen               | m-Inositol                  | 2-Keto-D-Gluconic Acid | ®-D-Lactose          | Lactulose        | Maltitol        | Maltose         | Maltotriose                |
| D1                     | D2                 | D3                       | D4                     | D5                     | D6                          | D7                     | D8                   | D9               | D10             | D11             | D12                        |
| D-Mannitol             | D-Mannose          | D-Melezitose             | D-Melibiose            | ®-Methyl-D-Galactoside | ®-Methyl-D-Galactoside      | ®-Methyl-D-Glucoside   | ®-Methyl-D-Glucoside | Palatinose       | D-Psicose       | D-Raffinose     | L-Rhamnose                 |
| E1                     | E2                 | E3                       | E4                     | E5                     | E6                          | E7                     | E8                   | E9               | E10             | E11             | E12                        |
| D-Ribose               | Salicin            | Sedoheptulosan           | D-Sorbitol             | L-Sorbose              | Stachyose                   | Sucrose                | D-Tagatose           | D-Trehalose      | Turanose        | Xylitol         | D-Xylose                   |
| F1                     | F2                 | F3                       | F4                     | F5                     | F6                          | F7                     | F8                   | F9               | F10             | F11             | F12                        |
| ®-Amino-butyric Acid   | Bromosuccinic Acid | Fumaric Acid             | ®-Hydroxy-butyric Acid | ®-Hydroxy-butyric Acid | p-Hydroxyphenyl-acetic Acid | ®-Keto-glutaric Acid   | D-Lactic Acid        | L-Lactic Acid    | D-Malic Acid    | L-Malic Acid    | Quinic Acid                |
| G1                     | G2                 | G3                       | G4                     | G5                     | G6                          | G7                     | G8                   | G9               | G10             | G11             | G12                        |
| D-Saccharic Acid       | Sebacic Acid       | Succinamic Acid          | Succinic Acid          | Succinic Acid          | N-Acetyl-Mono-Methyl Ester  | Alaninamide            | L-Alanine            | L-Alanyl-Glycine | L-Asparagine    | L-Aspartic Acid | L-Glutamic Acid            |
| H1                     | H2                 | H3                       | H4                     | H5                     | H6                          | H7                     | H8                   | H9               | H10             | H11             | H12                        |
| Glycyl-L-Glutamic Acid | L-Ornithine        | L-Phenylalanine          | L-Proline              | L-Pyroglutamic Acid    | L-Serine                    | L-Threonine            | 2-Amino Ethanol      | Putrescine       | Adenosine       | Uridine         | Adenosine-5'-Monophosphate |

**Figure S1.** Carbon sources in FF microplate with 95 wells, containing water as a control

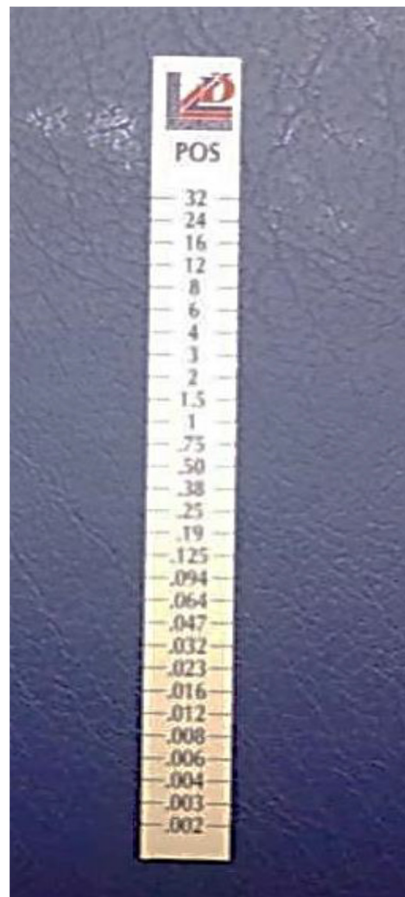

**Figure S2.** Liofilchem MIC test strip with 0.002-32 µg/ml posaconazole. The MIC test strip for voriconazole has the same concentration range

| Compound                           | 1 - <i>A. fumigatus</i> | 2 - <i>A. fumigatus</i> | 3 - <i>A. fumigatus</i> | 4 - <i>A. fumigatus</i> | 5 - <i>A. fumigatus</i> | 6 - <i>A. fumigatus</i> | 7 - <i>A. fumigatus</i> | 8 - <i>A. fumigatus</i> | 9 - <i>A. fumigatus</i> | 10 - <i>A. niger</i> | 11 - <i>A. fumigatus</i> | 12 - <i>A. niger</i> | 13 - <i>A. niger</i> | 14 - <i>A. fumigatus</i> | 15 - <i>A. fumigatus</i> | 16 - <i>A. fumigatus</i> | 17 - <i>A. fumigatus</i> | 18 - <i>A. niger</i> | 19 - <i>A. fumigatus</i> | 20 - <i>A. fumigatus</i> | 21 - <i>A. niger</i> | 22 - <i>A. flavus</i> | 23 - <i>A. fumigatus</i> | 24 - <i>A. fumigatus</i> | 25 - <i>A. niger</i> | 26 - <i>A. fumigatus</i> | 27 - <i>A. fumigatus</i> | 28 - <i>A. fumigatus</i> | 29 - <i>A. fumigatus</i> | 30 - <i>A. niger</i> | 31 - <i>A. fumigatus</i> | 32 - <i>A. flavus</i> | 33 - <i>A. niger</i> | 34 - <i>A. fumigatus</i> | 35 - <i>A. fumigatus</i> | 36 - <i>A. fumigatus</i> |
|------------------------------------|-------------------------|-------------------------|-------------------------|-------------------------|-------------------------|-------------------------|-------------------------|-------------------------|-------------------------|----------------------|--------------------------|----------------------|----------------------|--------------------------|--------------------------|--------------------------|--------------------------|----------------------|--------------------------|--------------------------|----------------------|-----------------------|--------------------------|--------------------------|----------------------|--------------------------|--------------------------|--------------------------|--------------------------|----------------------|--------------------------|-----------------------|----------------------|--------------------------|--------------------------|--------------------------|
| Apramycin sulphate                 | 0.315                   | 0.278                   | 0.253                   | 0.4                     | 0.201                   | 0.249                   | 0.281                   | 2.198                   | 2.16                    | 0.662                | 0.232                    | 1.198                | 0.451                | 0.253                    | 2.175                    | 0.685                    | 0.324                    | 0.555                | 0.33                     | 0.226                    | 0.233                | 0.326                 | 0.269                    | 0.286                    | 0.265                | 0.233                    | 0.24                     | 0.361                    | 0.706                    | 0.19                 | 0.32                     | 0.274                 | 0.225                | 0.35                     | 0.35                     | 0.36                     |
| Aminacrine                         | 0.367                   | 0.306                   | 0.255                   | 0.311                   | 0.209                   | 0.303                   | 0.269                   | 2.145                   | 2.026                   | 1.577                | 0.243                    | 1.225                | 0.226                | 0.325                    | 2.287                    | 0.295                    | 0.307                    | 1.509                | 0.275                    | 0.276                    | 0.199                | 0.392                 | 0.274                    | 0.305                    | 0.194                | 0.343                    | 0.37                     | 0.28                     | 0.318                    | 0.199                | 0.419                    | 0.382                 | 0.253                | 0.296                    | 0.31                     | 0.306                    |
| Zaragozic acid A                   | 0.237                   | 0.248                   | 0.226                   | 0.253                   | 0.191                   | 0.212                   | 0.217                   | 1.783                   | 1.919                   | 1.91                 | 0.191                    | 1.45                 | 0.173                | 0.237                    | 1.88                     | 0.259                    | 0.236                    | 1.729                | 0.243                    | 0.203                    | 0.174                | 0.289                 | 0.221                    | 0.249                    | 0.167                | 0.226                    | 0.233                    | 0.265                    | 0.272                    | 0.171                | 0.272                    | 0.259                 | 0.215                | 0.259                    | 0.3                      | 0.273                    |
| Blasticidin hydrochloride          | 0.268                   | 0.302                   | 0.258                   | 0.304                   | 0.203                   | 0.246                   | 0.318                   | 2.441                   | 2.047                   | 0.948                | 0.254                    | 0.697                | 0.199                | 0.253                    | 1.852                    | 0.312                    | 0.308                    | 0.549                | 0.248                    | 0.229                    | 0.182                | 0.351                 | 0.278                    | 0.295                    | 0.189                | 0.26                     | 0.218                    | 0.283                    | 0.305                    | 0.204                | 0.277                    | 0.275                 | 0.267                | 0.268                    | 0.284                    | 0.319                    |
| Thiordazine hydrochloride          | 0.282                   | 0.298                   | 0.247                   | 0.288                   | 0.202                   | 0.256                   | 0.295                   | 2.067                   | 2.23                    | 2.131                | 0.27                     | 1.624                | 0.232                | 0.262                    | 2.126                    | 0.313                    | 0.307                    | 2.061                | 0.256                    | 0.236                    | 0.195                | 0.349                 | 0.328                    | 0.31                     | 0.189                | 0.262                    | 0.248                    | 0.282                    | 0.304                    | 0.267                | 0.279                    | 0.289                 | 0.292                | 0.282                    | 0.294                    | 0.316                    |
| Sodium benzoate                    | 0.291                   | 0.311                   | 0.265                   | 0.304                   | 0.221                   | 0.289                   | 0.302                   | 2.067                   | 2.223                   | 2.04                 | 0.247                    | 1.588                | 0.227                | 0.277                    | 2.105                    | 0.313                    | 0.321                    | 1.674                | 0.262                    | 0.24                     | 0.196                | 0.416                 | 0.317                    | 0.304                    | 0.195                | 0.271                    | 0.235                    | 0.305                    | 0.314                    | 0.238                | 0.283                    | 0.298                 | 0.275                | 0.31                     | 0.298                    | 0.311                    |
| Chlortetracycline hydrochloride    | 0.346                   | 0.343                   | 0.307                   | 0.323                   | 0.268                   | 0.31                    | 0.338                   | 2.095                   | 1.399                   | 1.387                | 0.336                    | 0.741                | 0.264                | 0.352                    | 1.37                     | 0.403                    | 0.398                    | 0.724                | 0.4                      | 0.3                      | 0.268                | 0.402                 | 0.31                     | 0.402                    | 0.225                | 0.368                    | 0.281                    | 0.336                    | 0.408                    | 0.282                | 0.33                     | 0.442                 | 0.324                | 0.328                    | 0.416                    | 0.382                    |
| Sodium metasilicate                | 0.259                   | 0.31                    | 0.257                   | 0.294                   | 0.222                   | 0.257                   | 0.275                   | 2.11                    | 2.077                   | 0.491                | 0.296                    | 0.615                | 0.242                | 0.295                    | 2.028                    | 0.338                    | 0.33                     | 0.822                | 0.311                    | 0.253                    | 0.19                 | 0.351                 | 0.289                    | 0.308                    | 0.204                | 0.324                    | 0.342                    | 0.29                     | 0.323                    | 0.231                | 0.28                     | 0.324                 | 0.255                | 0.289                    | 0.295                    | 0.34                     |
| Pentamidine isethionate            | 0.406                   | 0.323                   | 0.288                   | 0.296                   | 0.227                   | 0.283                   | 0.306                   | 2.026                   | 2.076                   | 1.438                | 0.258                    | 1.515                | 0.309                | 0.264                    | 2.161                    | 0.29                     | 0.308                    | 1.669                | 0.301                    | 0.295                    | 0.36                 | 0.422                 | 0.268                    | 0.341                    | 0.2                  | 0.262                    | 0.286                    | 0.356                    | 0.349                    | 0.271                | 0.378                    | 0.298                 | 0.357                | 0.3                      | 0.336                    | 0.346                    |
| 6-Azauracil                        | 0.329                   | 0.293                   | 0.247                   | 0.287                   | 0.196                   | 0.246                   | 0.362                   | 2.252                   | 2.261                   | 1.953                | 0.247                    | 1.648                | 0.226                | 0.258                    | 2.058                    | 0.305                    | 0.296                    | 1.702                | 0.314                    | 0.229                    | 0.198                | 0.316                 | 0.364                    | 0.285                    | 0.243                | 0.259                    | 0.204                    | 0.257                    | 0.315                    | 0.277                | 0.274                    | 0.297                 | 0.236                | 0.294                    | 0.293                    | 0.314                    |
| Potassium chromate                 | 0.273                   | 0.283                   | 0.258                   | 0.369                   | 0.228                   | 0.257                   | 0.268                   | 1.788                   | 1.405                   | 1.855                | 0.246                    | 1.524                | 0.246                | 0.269                    | 1.334                    | 0.329                    | 0.319                    | 1.701                | 0.27                     | 0.267                    | 0.202                | 0.34                  | 0.248                    | 0.291                    | 0.205                | 0.323                    | 0.23                     | 0.286                    | 0.334                    | 0.2                  | 0.28                     | 0.325                 | 0.24                 | 0.304                    | 0.312                    | 0.338                    |
| Thialysine                         | 0.319                   | 0.27                    | 0.258                   | 0.279                   | 0.221                   | 0.26                    | 0.306                   | 2.185                   | 2.001                   | 1.411                | 0.226                    | 1.519                | 0.199                | 0.232                    | 1.914                    | 0.284                    | 0.275                    | 1.253                | 0.266                    | 0.217                    | 0.189                | 0.335                 | 0.229                    | 0.231                    | 0.181                | 0.246                    | 0.268                    | 0.286                    | 0.309                    | 0.25                 | 0.317                    | 0.331                 | 0.253                | 0.291                    | 0.312                    | 0.313                    |
| Berberine                          | 0.338                   | 0.311                   | 0.349                   | 0.305                   | 0.286                   | 0.284                   | 0.286                   | 2.217                   | 2.146                   | 2                    | 0.354                    | 1.689                | 0.309                | 0.314                    | 2.081                    | 0.519                    | 0.449                    | 1.49                 | 0.653                    | 0.313                    | 0.256                | 0.356                 | 0.271                    | 0.312                    | 0.281                | 0.306                    | 0.437                    | 0.335                    | 0.439                    | 0.281                | 0.426                    | 0.432                 | 0.35                 | 0.447                    | 0.253                    | 0.389                    |
| EGTA                               | 0.309                   | 0.322                   | 0.311                   | 0.369                   | 0.3                     | 0.32                    | 0.266                   | 2.393                   | 2.282                   | 2.175                | 0.305                    | 1.884                | 0.261                | 0.33                     | 2.248                    | 0.375                    | 0.393                    | 2.052                | 0.435                    | 0.32                     | 0.221                | 0.402                 | 0.273                    | 0.342                    | 0.218                | 0.413                    | 0.277                    | 0.36                     | 0.392                    | 0.319                | 0.33                     | 0.455                 | 0.319                | 0.351                    | 0.34                     | 0.46                     |
| Sodium pyrophosphate decahydrate   | 0.36                    | 0.374                   | 0.338                   | 0.395                   | 0.303                   | 0.368                   | 0.286                   | 2.196                   | 2.362                   | 0.951                | 0.327                    | 1.296                | 0.321                | 0.327                    | 2.277                    | 0.365                    | 0.368                    | 1.028                | 0.433                    | 0.317                    | 0.263                | 0.426                 | 0.326                    | 0.35                     | 0.277                | 0.385                    | 0.341                    | 0.369                    | 0.404                    | 0.273                | 0.363                    | 0.447                 | 0.332                | 0.353                    | 0.382                    | 0.53                     |
| Isoniazid                          | 0.392                   | 0.269                   | 0.238                   | 0.282                   | 0.203                   | 0.258                   | 0.267                   | 1.59                    | 1.545                   | 0.757                | 0.215                    | 0.514                | 0.178                | 0.238                    | 1.692                    | 0.281                    | 0.265                    | 0.551                | 0.382                    | 0.216                    | 0.184                | 0.319                 | 0.261                    | 0.295                    | 0.182                | 0.239                    | 0.219                    | 0.254                    | 0.277                    | 0.144                | 0.258                    | 0.251                 | 0.207                | 0.28                     | 0.271                    | 0.254                    |
| Methyl viologen dichloride hydrate | 0.289                   | 0.354                   | 0.296                   | 0.276                   | 0.221                   | 0.318                   | 0.302                   | 1.714                   | 1.305                   | 0.704                | 0.297                    | 0.646                | 0.321                | 0.314                    | 1.203                    | 0.4                      | 0.333                    | 0.48                 | 0.289                    | 0.295                    | 0.26                 | 0.374                 | 0.341                    | 0.29                     | 0.233                | 0.363                    | 0.283                    | 0.32                     | 0.398                    | 0.334                | 0.305                    | 0.446                 | 0.292                | 0.291                    | 0.369                    | 0.347                    |
| Sodium fluoride                    | 0.36                    | 0.278                   | 0.308                   | 0.301                   | 0.241                   | 0.268                   | 0.298                   | 1.58                    | 1.576                   | 0.885                | 0.215                    | 1.411                | 0.188                | 0.254                    | 1.709                    | 0.293                    | 0.288                    | 1.02                 | 0.362                    | 0.225                    | 0.172                | 0.324                 | 0.235                    | 0.155                    | 0.143                | 0.234                    | 0.291                    | 0.347                    | 0.319                    | 0.186                | 0.32                     | 0.26                  | 0.234                | 0.288                    | 0.322                    | 0.181                    |
| Cisplatin                          | 0.675                   | 0.288                   | 0.263                   | 0.3                     | 0.209                   | 0.253                   | 0.297                   | 1.394                   | 1.447                   | 0.69                 | 0.244                    | 0.628                | 0.219                | 0.246                    | 1.416                    | 0.295                    | 0.283                    | 0.568                | 0.59                     | 0.236                    | 0.186                | 0.33                  | 0.257                    | 0.306                    | 0.196                | 0.266                    | 0.242                    | 0.308                    | 0.319                    | 0.186                | 0.271                    | 0.274                 | 0.248                | 0.316                    | 0.301                    | 0.305                    |
| Aluminium sulphate                 | 0.346                   | 0.39                    | 0.292                   | 0.337                   | 0.245                   | 0.291                   | 0.27                    | 1.537                   | 1.393                   | 0.712                | 0.323                    | 0.781                | 0.253                | 0.358                    | 1.464                    | 0.317                    | 0.375                    | 0.474                | 0.336                    | 0.261                    | 0.252                | 0.44                  | 0.329                    | 0.304                    | 0.284                | 0.292                    | 0.286                    | 0.317                    | 0.347                    | 0.339                | 0.367                    | 0.317                 | 0.26                 | 0.325                    | 0.376                    | 0.341                    |
| Fluconazole                        | 0.379                   | 0.27                    | 0.279                   | 0.265                   | 0.186                   | 0.272                   | 0.441                   | 0.908                   | 1.181                   | 0.649                | 0.206                    | 0.989                | 0.194                | 0.278                    | 1.264                    | 0.282                    | 0.263                    | 0.522                | 0.475                    | 0.253                    | 0.169                | 0.3                   | 0.277                    | 0.185                    | 0.139                | 0.206                    | 0.249                    | 0.315                    | 0.322                    | 0.151                | 0.283                    | 0.282                 | 0.216                | 0.288                    | 0.324                    | 0.269                    |
| Propiconazole                      | 0.328                   | 0.294                   | 0.265                   | 0.33                    | 0.215                   | 0.311                   | 0.277                   | 1.656                   | 1.189                   | 1.035                | 0.221                    | 0.759                | 0.209                | 0.253                    | 1.256                    | 0.286                    | 0.278                    | 1.098                | 0.471                    | 0.227                    | 0.189                | 0.315                 | 0.243                    | 0.271                    | 0.194                | 0.258                    | 0.227                    | 0.276                    | 0.295                    | 0.178                | 0.262                    | 0.271                 | 0.216                | 0.279                    | 0.275                    | 0.276                    |
| Tamoxifen                          | 0.33                    | 0.298                   | 0.262                   | 0.328                   | 0.218                   | 0.276                   | 0.297                   | 1.497                   | 1.185                   | 0.641                | 0.222                    | 0.494                | 0.225                | 0.25                     | 1.301                    | 0.28                     | 0.287                    | 0.505                | 0.486                    | 0.248                    | 0.192                | 0.31                  | 0.255                    | 0.287                    | 0.175                | 0.258                    | 0.244                    | 0.267                    | 0.306                    | 0.191                | 0.267                    | 0.272                 | 0.204                | 0.273                    | 0.264                    | 0.261                    |

**Figure S3.** Absorbance readings taken at 750nm after 48hr of incubation of isolates in a growth medium incorporated with the 24 compounds. Red indicates susceptibility and yellow indicates the resistance of isolates to the potential antifungal compounds.

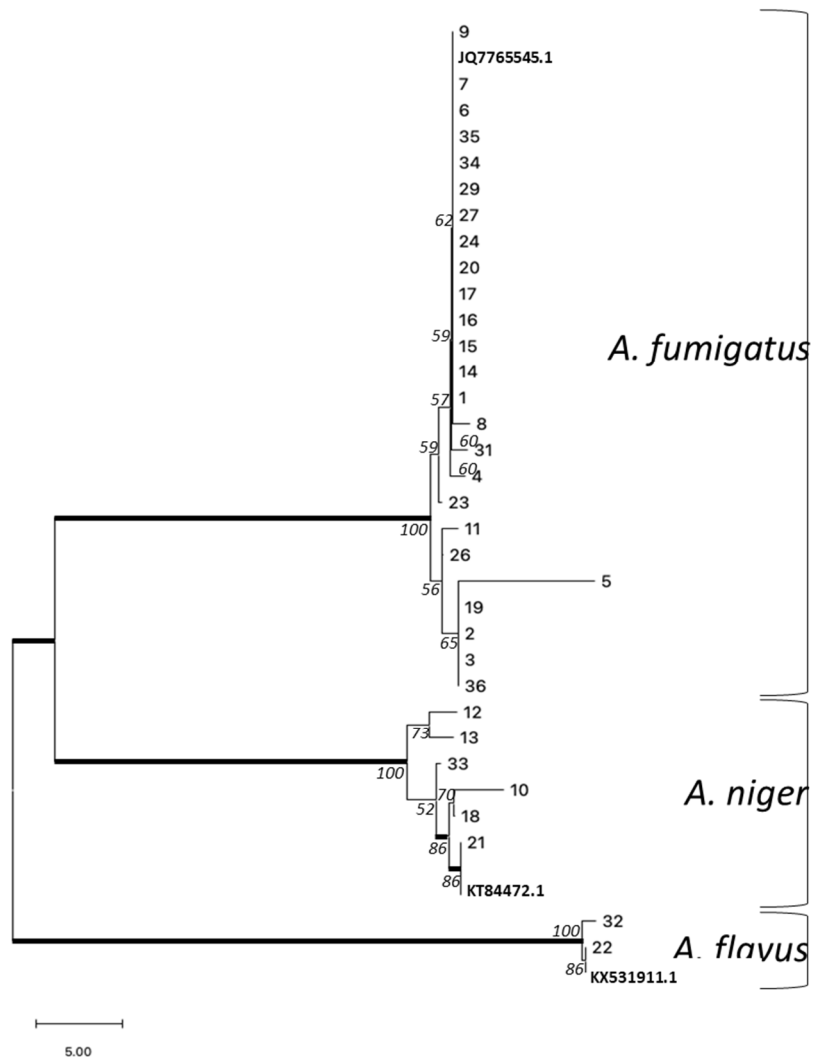

**Figure S4.** Phylogenetic tree showing isolates of *Aspergillus* species. The sequences were aligned and the tree was done using Neighbour-Joining analysis and visualised on Treebase. dark lines that the branches with more than 75% support with UPGMA to the NJ tree (1000 bootstrap).
